# Supplementary material
Source: Research Square preprint supplement (doi:10.21203/rs.3.rs-9175787/v1)
Supplement: Supplementary file 1 [file 0505ba6112983e1044e5ce14.docx]

Table S1 | Comprehensive summary of bit-exactness, statistical randomness, diffusion sensitivity and integrity validation (48kHz/24-bit stereo WAV)

| **Validation target** | **Validation procedure** | **Metric/output** | **Key results** | **Main text value to report** | **Evidence (figure/file)** |
| --- | --- | --- | --- | --- | --- |
| Preprocessing for stable framing | Onset detection and trimming to remove leading silence and noise | Onset sample index; trimmed length | Onset = 20,161 (0.420 s); trimmed length: M = 5,638,174 samples (117.462 s) | Onset = 0.420 s; M = 5,638,174 | Fig. 1; section1_read_onset.m |
| Bit-exact framing and deframing | Non-overlapping framing (N = 4096, hop = 4096) and reconstruction | nFrames;  tail padding;  sample-by-sample equality | nFrames = 1377;  padLen = 2018 samples (≈0.042 s).  **Bit-exact passed** | nFrames = 1377; padLen = 2018 | Section2_frames.m |
| CLFT reversibility (integer domain) | Forward CLFT followed by inverse CLFT per frame and channel | Bit-exact pass/fail | **All frames passed (L/R)** | “Exact recovery at every sample” | section3_clft.m |
| LCBRP permutation reversibility | Block permutation followed by inverse permutation per frame and channel | Bit-exact pass/fail | **All frames passed (L/R)** | “Permutation is strictly invertible” | section4_lcbrp_permutation.m |
| Diffusion reversibility | Diffusion followed by inverse diffusion per frame and channel | Bit-exact pass/fail | **All frames passed (L/R)** | “Diffusion stage is exactly invertible” | section5_diffusion.m |
| End-to-end reversibility (archival requirement) | Encryption to decryption at frame level; reassemble full signal and compare | Bit-exact pass/fail at frame and signal level | **Frame- and signal-level passed** | “Bit-exact at frame and full-signal levels” | section6_end_to_end_v3.m |
| Ciphertext byte uniformity | Per-byte histograms for bytes 0–3; pooled entropy | Entropy (H) (0–8); chi-square; histogram | Per-byte H (All) ≈ 7.9991–7.9995; pooled H (All) ≈ 7.9999; pooled χ2: L = 5108.09, R = 2968.85, All = 7407.92 | Report pooled entropy and χ2; note near-uniformity | Fig. 2 (2 × 2 histograms); section7_security_metrics.m |
| Adjacent-byte dependence (cipher payload) | Adjacent-byte scatter (byte stream) and adjacent correlation | Adjacent correlation coefficient; scatter | Adjacent corr (uint32): L = −0.000625, R = −0.000687, All = −0.000656 | “Near-zero adjacent dependence” | Fig. 3; section7_security_metrics.m |
| Ciphertext preview (illustration only) | Float WAV preview from ciphertext payload (for visual illustration only) | Waveform; amplitude histogram | Preview WAV and figures generated | For illustration purposes only; not a security metric | Figs. 14–15; section8_cipher_audio_preview.m |
| Cipher correlation (byte domain) | Adjacent correlation (corr); lag corr at {1,2,4,8}; inter-channel corr; plaintext–ciphertext corr | r (lag); corr (bL, bR); corr (plain, cipher) | Adjacent corr (All) = 0.001803; lag corr (All) = [0.001803, −0.004271, −0.000545, −0.002968]; inter-channel corr = 0.020278; plain-cipher corr (All) = 0.000313 | Report pooled values; note coefficients at a 10−3 scale | Figs. 4a–b; Fig. 5; section9_correlation_analysis.m |
| Plaintext 1-bit differential test | 1-bit LSB flip per frame and channel; compare ciphertext bytes | NSCR/UACI/BACI-lite | All: NSCR = 99.5971%, UACI = 33.4399%, BACI-lite = 19.8460% (stable over 50 frames) | Report pooled means | Figs. 6–7; section9_diff_metrics_byte.m |
| Key sensitivity (near minimal) | Case A: flip 1-bit of whitening seed base; Case B: flip 1-bit of diffusion master IV; and Case C: minimal permutation swap | NSCR/UACI/BACI-lite; equality-rate sanity | All: NSCR ≈ 99.60%; UACI ≈ 33.41%–33.49%; equality rate 0/50 for all cases | Emphasize no identical-ciphertext collisions in the tested frames | Figs. 8–9; section10_key_sensitivity_metrics.m |
| Ciphertext tamper impact on recovered plaintext | Flip a single random ciphertext bit per channel; decryption; compare recovered plaintext bytes | NSCR/UACI/BACI-lite on recovered plaintext | ByteDiff | Histogram | Figs. 10–11; section11_ciphertext_sensitivity_metrics.m |
| Frame-level integrity (HMAC-SHA-256) | Per frame tag; baseline verification; tamper test with 1-bit ct flip | Detection rate; tag bit-flip rate; false accepts | Baseline verify: 200/200 (L/R/All); tamper: false accept 0/200; detection 100%; tag bit-flip mean ≈ 49.7168% (All) | “Integrity is enforced by authentication, not decryption avalanche” | Figs. 12–13; section12_integrity_hmac.m |
